# Supplementary material for: In-vial solid-phase extraction of polycyclic aromatic hydrocarbons in drug formulations stored in packaging containing rubber
Source: Royal Society of Chemistry journal article supplement (doi:10.1039/d2ra07582b), 2023-01-01
Supplement: d2ra07582b1.pdf [file d2ra07582b1.pdf]

## In-Vial Solid-Phase Extraction of Polycyclic Aromatic Hydrocarbons in Drug Formulations Stored in Packaging Containing Rubber

Hao Yang<sup>a,b</sup>, Yinmeng Ding<sup>a,b</sup>, Ya Ding<sup>a,b,\*</sup>, Jing Liu<sup>a,b,\*</sup>

<sup>a</sup> Department of Pharmaceutical Analysis, China Pharmaceutical University, 24 Tongjiaxiang, Nanjing 210009, China

<sup>b</sup> Key Laboratory of Drug Quality Control and Pharmacovigilance, Ministry of Education, China Pharmaceutical University, 24 Tongjiaxiang, Nanjing 210009, China

\*E-mail: dingya@cpu.edu.cn (Y. Ding), liujing@cpu.edu.cn (J. Liu)

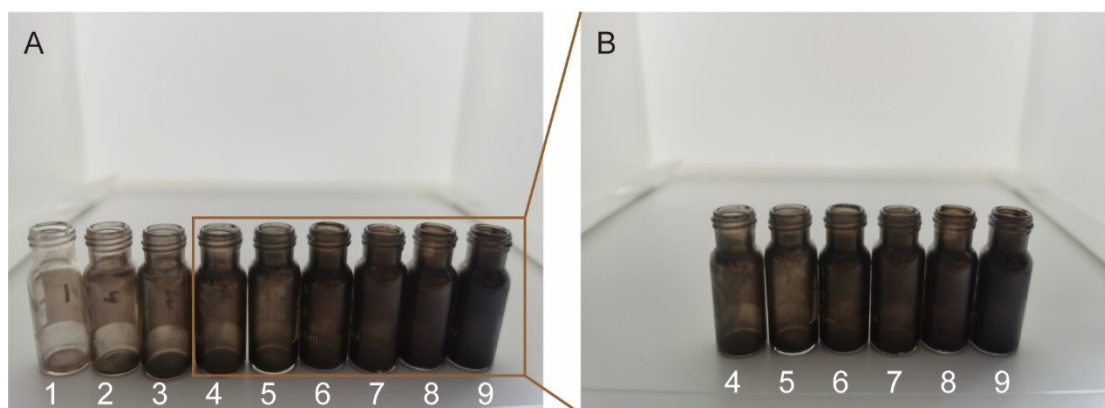

Fig. S1 Photos of vials modified with different numbers of PDA layer. Vials were modified with one to nine layers (A) and four to nine layers (B).

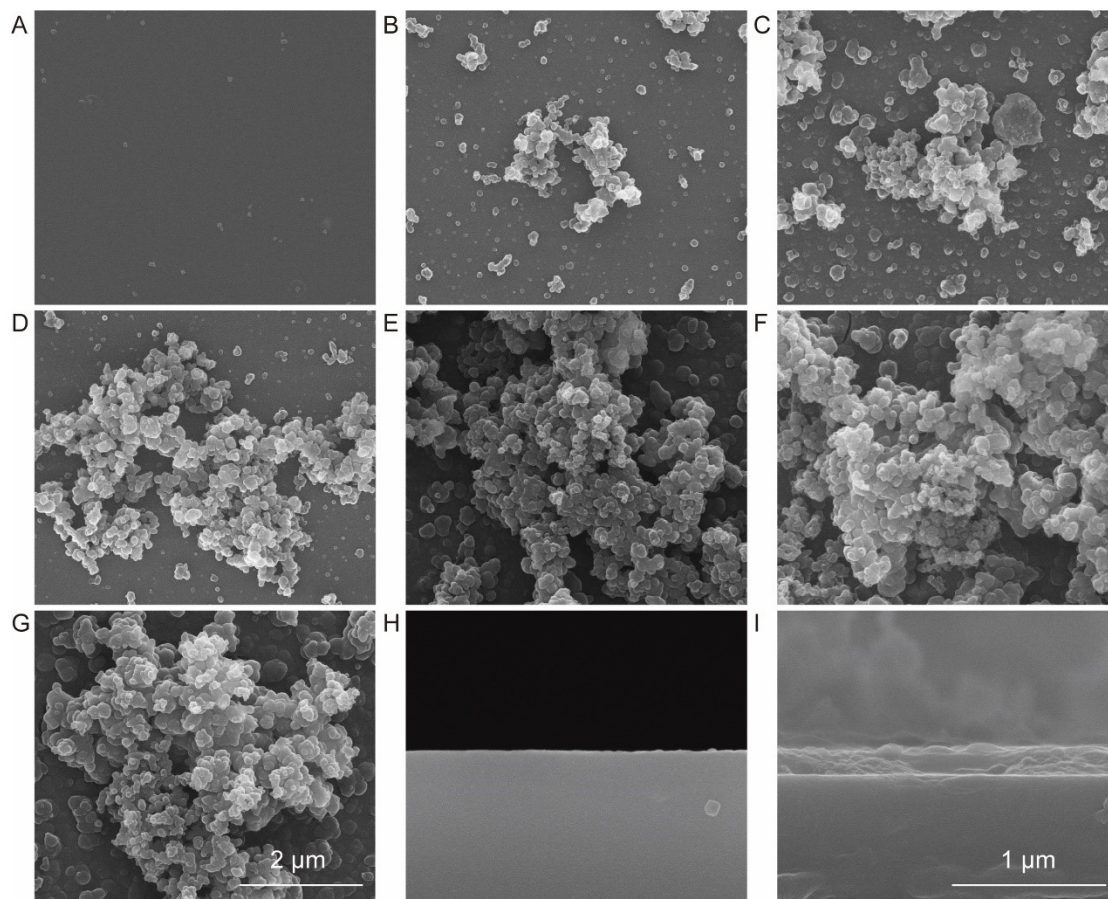

Fig. S2 SEM images of vials unmodified and modified with different numbers of PDA layer. The inner surface of the bare vial (A), one layer (B), three layers (C), five layers (D), seven layers (E), eight layers (F) and nine layers (G). The cross-section of the bare vial (H) and nine-layer PDA modified vial (I).

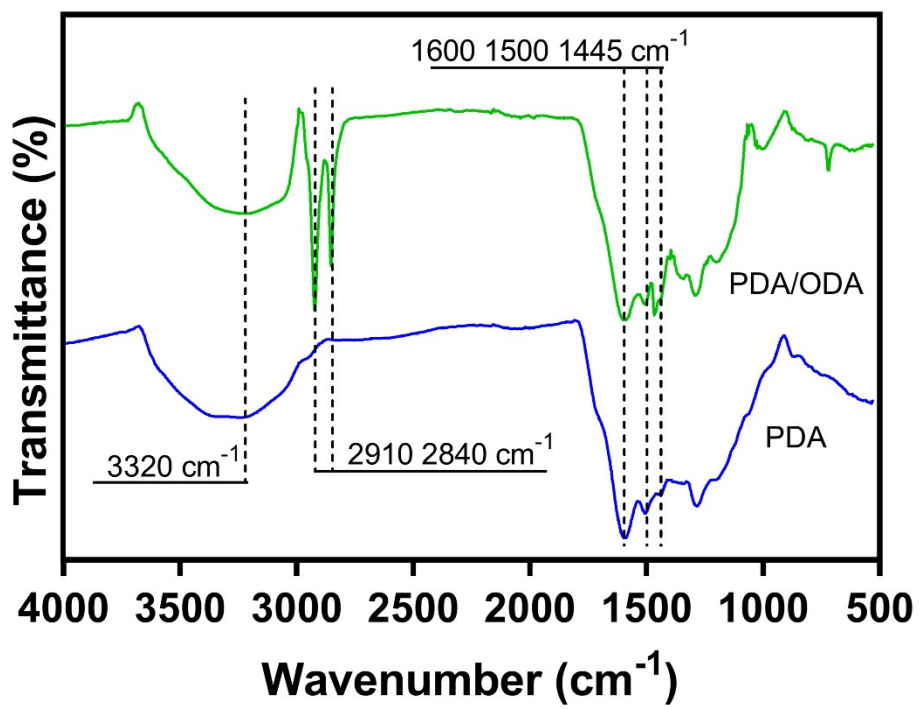

Fig. S3 The ATR-FT-IR spectra of PDA and PDA/ODA coated vials.
